# Supplementary material for: Co-infusion of high-dose haploidentical donor cells and CD19-targeted CART cells achieves complete remission, successful donor engraftment and significant CART amplification in advanced ALL
Source: PubMed Central journal article supplement — Ther Adv Med Oncol. 2020 May 28;12:1758835920927605. doi: 10.1177/1758835920927605 (PMC7268154; doi:10.1177/1758835920927605), 2020-05-28
Supplement: Supplementary_figure_and_table.pdf [file Supplementary_figure_and_table.pdf]

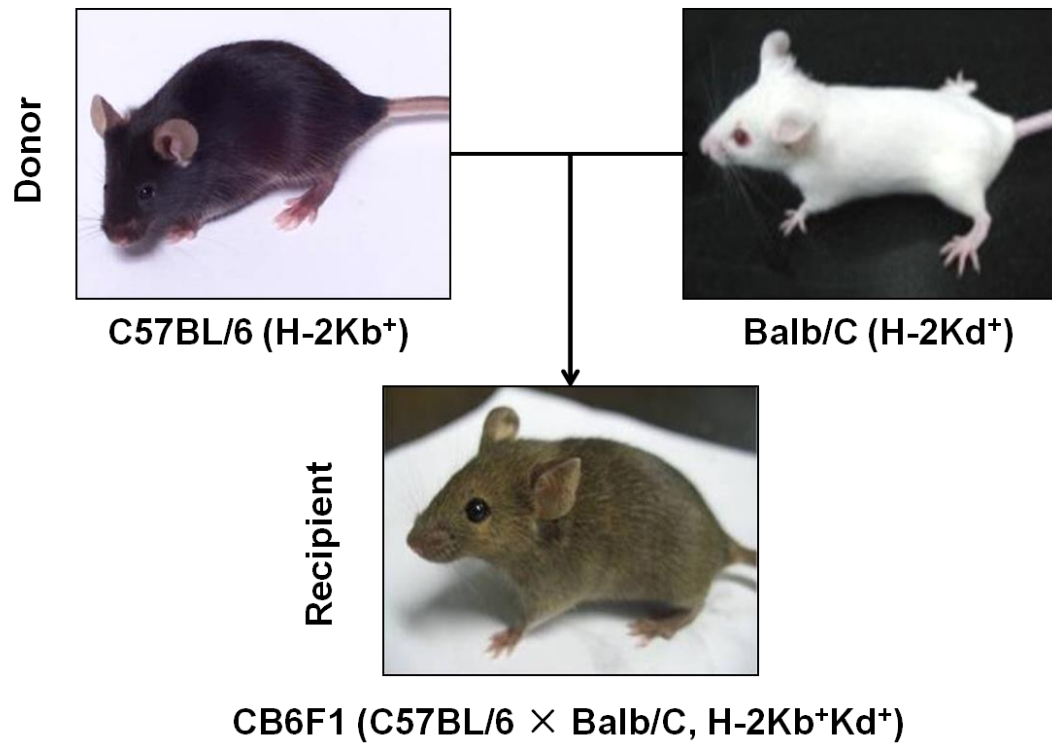

**Supplementary Figure. The mouse model of haploidentical donor cell infusion.**

**Supplementary Table. Donor engraftment and GVHD by different doses of donor cell infusion in the mouse model**

| Donor cells infused (no.) | Chimerism type         | GVHD incidence | Death due to GVHD | Median survival |
|---------------------------|------------------------|----------------|-------------------|-----------------|
| 0                         | Microchimerism (10/10) | 0/10           | 0/10              | ≥6M             |
| 1×10 <sup>7</sup>         | Microchimerism (10/10) | 0/10           | 0/10              | ≥6M             |
| 2×10 <sup>7</sup>         | Microchimerism (10/10) | 0/10           | 0/10              | ≥6M             |
| 4×10 <sup>7</sup>         | Microchimerism (10/10) | 0/10           | 0/10              | ≥6M             |
| 8×10 <sup>7</sup>         | Microchimerism (2/10)  | 0/2            | 0/2               | ≥6M             |
|                           | FDC (8/10)             | 0/8            | 0/8               | ≥6M             |

All CB6F1 recipient mice received 200mg/kg cytarabine preconditioning and were assigned to five subgroups based on different infusion numbers of mobilized splenic mononuclear cells from C57BL/6 donor mice: 0, 1×10<sup>7</sup>, 2×10<sup>7</sup>, 4×10<sup>7</sup>, and 8×10<sup>7</sup>. There were 10 mice per (sub) group. No GVHD prophylaxis was used in any group. Microchimerism is defined as donor cells < 1%. FDC: full donor chimerism; M: months.
